# Supplementary material for: Informative Gene Selection and Direct Classification of Tumor Based on Chi-Square Test of Pairwise Gene Interactions
Source: Biomed Res Int. 2014 Jul 23;2014:589290. doi: 10.1155/2014/589290 (PMC4130026; doi:10.1155/2014/589290)
Supplement: Supplementary file 1 — Table S1: The number of genes selected by the different models. Table S2: Overlaps of genes selected by different models. [file 589290.f1.zip]

Archive with 16 entries (12 files):
- mat.589290.v2/
- mat.589290.v2/additional file 1/
- mat.589290.v2/additional file 1/Table S1 The number of genes selected by the different models.xlsx
- mat.589290.v2/additional file 1/Table S2 Overlaps of genes selected by different models.xlsx
- mat.589290.v2/additional file 2/
- mat.589290.v2/additional file 2/chi-IRG-DC/
- mat.589290.v2/additional file 2/chi-IRG-DC/get_chi_square.m
- mat.589290.v2/additional file 2/chi-IRG-DC/get_chi_square_single.m
- mat.589290.v2/additional file 2/chi-IRG-DC/get_chi_weight_rank.m
- mat.589290.v2/additional file 2/chi-IRG-DC/get_top_gain_tsn.m
- mat.589290.v2/additional file 2/chi-IRG-DC/go_Chi_IRG_DC.m
- mat.589290.v2/additional file 2/chi-IRG-DC/leuk1_test.mat
- mat.589290.v2/additional file 2/chi-IRG-DC/leuk1_train.mat
- mat.589290.v2/additional file 2/chi-IRG-DC/readme.doc
- mat.589290.v2/additional file 2/chi-IRG-DC/tsn_loocv_rate.m
- mat.589290.v2/additional file 2/chi-IRG-DC/tsn_predict.m
