# Supplementary material for: Informative Gene Selection and Direct Classification of Tumor Based on Chi-Square Test of Pairwise Gene Interactions
Source: Biomed Res Int. 2014 Jul 23;2014:589290. doi: 10.1155/2014/589290 (PMC4130026; doi:10.1155/2014/589290)
Supplement: Supplementary file 1 — Table S1: The number of genes selected by the different models. Table S2: Overlaps of genes selected by different models. [file 589290.f1.zip › mat.589290.v2/additional file 1/Table S1 The number of genes selected by the different models.xlsx]

## Sheet: Sheet1
Table S1 The number of genes selected by the different models
Dataset	mRMR-SVM	SVM-RFE-SVM
Leuk1	2006,3898,2288,1893,532,7128,6606	4342,4177,5552,6510,2020	2335,4680,4055,6696,6606,2288,1882,1893,5300,4379, 6789,1106,4342,6323,6049,758,2867,6168,703,5466, 1046,4318,5554,2215,4156,1268,4586,4750,3728
Lung1	3189,5385,3336,5074,2314,4863,6901,1966,2528,2329, 2243,2832,5643	3238,6121,608,5861,238,1966,6901,4425,5074	4130,7040,3897,4408,2498,5832,756,207,5834,5102, 2369,1519,2059,2584,2528,6901,1625,7094,6562,2331, 765,2664,2243,7055,4417,624
Leuk2	3634,9412,10274,9148,2770,12355,4868,9882,8420,12418, 4347,6267,6337,7516,9394,4745,3091,10966,7666	8165,12479,5801,5265,4695,4474,8098,4891	6278,5370,2912,1119,7136,4621,6048,7666,2261,3084, 1461,8869,318,5955,4932,2770,4197,5326,4327,7782
SRBCT	842,85,1901,1389,2162,354,1799,1911,731	545,509,742	187,1319,2046,2050,1003,107,129,246,1645,846, 1980,255,1954,836,1916,1,1884,783,1066,2022, 1387,123,1735
Breast	7798,8186,8780,5338,5816,3307,7317,1296,5272,6978, 8918,6623,6595,74,5452,2507,4520,1143,6554,1047, 4763,8501,6344,8949,7103,8739,1117,7885,8984,482, 5544,5629,7821,4478,1114,2452,5564,2725,2973,8715, 8154,8506,7861,9129,1280,3300,2585,1890,443,8380, 8279,8717,1009,532,4096,6427,7634,4085,6991,7505, 3293,6101,3183,7283,4660,8532,4479,8574,3226,5651, 4141,7947,3551,7797,1819,3345,1306,5690,7906,83…	8700,3551,6595,7996,5846,5647,7403	2585,109,4085,5651,7518,8944,2904,8506,658,9111, 3635,868,4327,7221,4356,6794,3551,1038,3522,877, 6590,4759,8937,6797,7797,884,866,3298,2327,4490, 5793
Lung2	3191,11969,6686,9412,8986,3273,10573,4525,10380,8496, 9770,8457,10684,7135,3230,7316,4626,9416,5557,5920, 10891,7052,10577,8157,5163,8533,5314,11651,8766,7261, 9771,3227,11943,8962,5032,5141,7349,5489,8156,11320, 4862,12375,8371,8072,5761,12523,4764,8476,6513,9850, 6520,10856,6987,12121,3199,5355,9038,3236,8987,6870, 5619,1159,11755,9743,7298,6539,5980,8831,7522,7756, 8479,9716,7216,8356,1633,124…	7199,8766,11651,9134,5790,10766,3845,6165,8737	11798,6134,10573,4122,9170,10139,8419,3191,9407,3157, 7316,2761,7317,9310,7750,8986,8683,9840,8024,5905, 8290,3776,9157,10524,3020,6690,7087,4879,12521,9763, 4730,10512,4622,5955,8175,7713,1335,11592,6687,10684, 9330,9858,12285,8987,12286,4690,11013,9743,11247,10629, 9873,8849
DLBCL	767,484,1700,1211,2293,2612,3617,3933,2808,1918, 2212,1065,3735,976,800,2797	1622,2819,3735,2927,2098,2861,1223,2910,263,851, 3150,681,1270	3795,3794,3793,3754,3763,3734,3789,3735,3804,3786, 2815,2802,2801,1622,3029,3755,1006,3736,2797,3760, 3859,852,3772,3749,3801,2808,2806,2742,2164,757, 851,2861,3703,2601,2747,2756,2736
Leuk3	2543,7560,12342,10749,7781,4610,6620,11959,5735,10391, 4272,10583,11155,3228,3807,11429,10511,2943,5395,6516, 4300,6753,12468,6561,9107,7224,9773,11248,8855,7018, 8595,8761,6906,3006,9608,6671,5991,4255,7755,10949, 11467,11782,12319,9198,7086,10166,12313,4801,6684,8536, 6611,5531,7907,9389,8313,12302,6773,7199,4167,2721, 12084,8548,9262,6360,6222,11912,9035,7483,7223,10720, 9939,3656,3035,5736,77…	3228,4272,12202,10166,8489,6906,8532,8536,7454,11368, 2884,7366,6773,6671,8548,11005,5411,7648,9568,2934, 6320,9608,11782,7560,10511,8518,4255,8956,3324,8558, 7335,11566,6516,9137,4714	3585,3228,11554,6229,8761,8956,8957,9833,6516,9035, 3400,5837,2543,3401,11248,12343,3267,2013,6671,8595, 3350,4319,9107,6684,8889,10391,8990,11155,3133,6320, 11169,11317,4610,7250,9773,11751,9580,11154,7648,1070, 11782,1795,7032,6592,5944,8598
Cancers	2250,9583,6084,8510,3761,3264,11562,8779,2066,9171, 12470,1859,7737,2621,10075,4792,815,10162,6070,4273, 12161,4760,10974,4804,5396,8430,9403,898,11693,6605, 3823,4963,8145,10617,4803,8002,8954,12405,5178,7179, 9753,6911,11670,8547,10779,6812,5780,3429,2557,7144, 3306,11589,6073,8940,5407,9029,4066,3144,9429,8767, 8724,6902,8641,7089,7688,1123,7380,5040,9759,7639, 11200,10377,7185,6830,5880,1584,…	7688,231,6751,11260,3917,8842,2616,10841,11815,4331, 4105,2272,1631,2797,196,10875,6822,5860,11383,702, 10617,941,9029,3358,1943,2987,4803,12464,10996	10872,9240,11808,6176,11320,4005,11552,7219,9239,9169, 2196,10814,6342,8950,5246,12304,1241,8657,11506,11452, 8643,6141,7063,4004,10587,542,3450,3148,3538,8662, 673,9324,5809,4503,12239,8394,6720,5728,4336,2483, 4978,4818,6551,1884,505,2530,3765
GCM	6731,14232,227,114,13158,10732,5181,6117,12472,9039, 2807,2499,2990,8935,5958,3323,9572,14905,7636,14998, 12248,2538,7440,2080,2759,14841,7016,8187,7998,6024, 6747,9862,12765,568,9907,11314,3492,6727,7608,13609, 11738,3709,10622,3756,126,9271,5036,10121,8839,6118, 13527,26,1972,13285,2579,9621,8843	2362,7185,13836,2259,12395,5357,12414,5553,6322,687, 11820,7887,4469,12472,3926,14857,2897,10048,10487,7023, 3275,4312,12840,1807,5491,6482,13609,2939,15654,14232, 2005,12103,4047,6915,2159,972,5239,45,13158,7192, 12897,702,5520,383,15315,14865,5716,7994,14538,10298, 10234,6364,11517,12415,3160,9288,5336,5711,5200,14011, 12059,1848,1221,2001,2757,9718,6515,15086,2398,13869, 13755,3197,4652,9840,1…	6702,5639,15025,8702,2335,6188,15997,7919,6732,2156, 11407,13157,3709,5772,8639,5358,13382,7268,14861,1667, 7889,6252,4993,4469,8078,11738,2139,1984,9790,5520, 12469,9881,9977,13266,11113,4928,12182,1904,220,7317, 3344,13629,7926,928,5239,15900,5998,12140,165,6377, 676,9045,2913,3729,5988,1597,15401,6296,2005,1960, 4047,4374,9986,1852
