# Supplementary material for: Informative Gene Selection and Direct Classification of Tumor Based on Chi-Square Test of Pairwise Gene Interactions
Source: Biomed Res Int. 2014 Jul 23;2014:589290. doi: 10.1155/2014/589290 (PMC4130026; doi:10.1155/2014/589290)
Supplement: Supplementary file 1 — Table S1: The number of genes selected by the different models. Table S2: Overlaps of genes selected by different models. [file 589290.f1.zip › mat.589290.v2/additional file 1/Table S2 Overlaps of genes selected by different models.xlsx]

## Sheet: Sheet1
Table S2 Overlaps of genes selected by different models
Dataset	A	B	C	A∩B	A∩C	B∩C	A∩B∩C
Leuk1	7	5	29	0	3	1	0
Lung1	13	9	23	3	3	1	1
Leuk2	19	8	20	0	2	0	0
SRBCT	9	3	23	0	0	0	0
Breast	97	7	31	2	6	1	1
Lung2	120	9	52	4	9	0	0
DLBCL	16	13	37	1	3	4	1
Leuk3	119	35	46	20	21	7	6
Cancers	89	29	47	4	0	0	0
GCM	57	199	64	7	2	10	1
Note A: selected genes with mRMR-SVM，B: selected genes with SVM-RFE-SVM， C：selected genes with
