# Supplementary material for: Informative Gene Selection and Direct Classification of Tumor Based on Chi-Square Test of Pairwise Gene Interactions
Source: Biomed Res Int. 2014 Jul 23;2014:589290. doi: 10.1155/2014/589290 (PMC4130026; doi:10.1155/2014/589290)
Supplement: Supplementary file 1 — Table S1: The number of genes selected by the different models. Table S2: Overlaps of genes selected by different models. [file 589290.f1.zip › mat.589290.v2/additional file 2/chi-IRG-DC/get_top_gain_tsn.m]

function [sel_id,sel_acc]=get_top_gain_tsn2(train_data,test_data,x_index,top_num)
t=1;
sel_acc(t,1)=0;
sel_acc(t,2)=0;
sel_acc(t,3)=0;
sel_id(t)=x_index(1);
for i=2:top_num
sel_x=[sel_id x_index(i)];
sel_train=train_data(:,[1 sel_x+1]);
sel_test=test_data(:,[1 sel_x+1]);
[acc,rate]=tsn_loocv_rate(sel_train);
if acc>sel_acc(t,1) || acc==sel_acc(t,1) && rate>sel_acc(t,2)
    t=t+1; sel_acc(t,1)=acc; sel_acc(t,2)=rate;
    [sel_acc(t,3),~]=tsn_predict(sel_train,sel_test); 
    sel_id(t)=x_index(i);
    save chi_acc_tsn sel_acc sel_id
end
end
end
