# Supplementary material for: Informative Gene Selection and Direct Classification of Tumor Based on Chi-Square Test of Pairwise Gene Interactions
Source: Biomed Res Int. 2014 Jul 23;2014:589290. doi: 10.1155/2014/589290 (PMC4130026; doi:10.1155/2014/589290)
Supplement: Supplementary file 1 — Table S1: The number of genes selected by the different models. Table S2: Overlaps of genes selected by different models. [file 589290.f1.zip › mat.589290.v2/additional file 2/chi-IRG-DC/go_Chi_IRG_DC.m]

train=struct2array(load('leuk1_train.mat'));
[chi_single]=get_chi_square_single(train);
[~,x_index]=get_chi_weight_rank(train,chi_single);
test=struct2array(load('leuk1_test.mat'));
num=size(x_index);
[sel_gene,test_acc]=get_top_gain_tsn(train,test,x_index,num*0.02);
save leuk1_result sel_gene test_acc
