# Supplementary material for: Informative Gene Selection and Direct Classification of Tumor Based on Chi-Square Test of Pairwise Gene Interactions
Source: Biomed Res Int. 2014 Jul 23;2014:589290. doi: 10.1155/2014/589290 (PMC4130026; doi:10.1155/2014/589290)
Supplement: Supplementary file 1 — Table S1: The number of genes selected by the different models. Table S2: Overlaps of genes selected by different models. [file 589290.f1.zip › mat.589290.v2/additional file 2/chi-IRG-DC/tsn_predict.m]

function [accuary,predict_y]=tsn_predict(train,test)
%compute independent prediction accuracy based on  -DC 
y_label=unique(train(:,1));
class_num=length(y_label);
test_num=size(test,1);
for i=1:test_num
    for j=1:class_num
    tmp=[train;[y_label(j) test(i,2:end)]];
    tmp_chi=get_chi_square(tmp);
    chi(j)=sum(tmp_chi(:));
    end
    m=max(chi);
    id=find(chi==m);
    m_num=size(id,2);
    rnd_id=fix(rand*m_num+1);
    predict_y(i,1)=y_label(id(rnd_id));   
end
accuary=sum((test(:,1)-predict_y(:,1))==0)/test_num;
end
